# Supplementary material for: Auditory-vibrotactile interactions in perception of timbre acoustic features
Source: Research Square preprint supplement (doi:10.21203/rs.3.rs-6456372/v1), 2025-09-01
Supplement: Supplementary file [file fb7632360d04b8a0967bb38f.pdf]

# Auditory and vibrotactile interactions in perception of timbre acoustic features

Loonan Chauvette<sup>1,2,\*</sup>, Anne Sophie Grenier<sup>1,3</sup>, Philippe Albouy<sup>1,3</sup>, Emily Coffey<sup>4,5,6,7</sup>, Robert Zatorre<sup>5,6,7</sup>, and Andréanne Sharp<sup>1,2,5</sup>

<sup>1</sup>CERVO Brain Research Centre, Université Laval, Quebec City, G1E 1T2

<sup>2</sup>Faculty of Medicine, Université Laval, Quebec City, G1V 0A6, Canada

<sup>3</sup>School of Psychology, Laval University, Quebec City, G1V 0A6, Canada

<sup>4</sup>Concordia University, Montreal, H3G 1M8, Canada

<sup>5</sup>Montreal Neurological Institute, McGill University, Montreal, H3A 2B4, Canada

<sup>6</sup>Centre for Research on Brain, Language and Music (CRBLM), McGill University, Montreal, H3G 2A8, Canada

<sup>7</sup>International Laboratory for Brain, Music and Sound Research (BRAMS), Montreal, H2V 2S9, Canada

\*loonan.chauvette@cervo.ulaval.ca

## Notes on model fitting, diagnosis, and evaluation

For number of harmonics, model residuals diagnostics revealed a significant departure from uniformity of fixed effects,  $D = 0.28$ ,  $p < .001$ , and random effects,  $D = 0.34$ ,  $p = .001$ . Furthermore, the random effect variance was almost null (adjusted ICC  $\approx 0$ ), meaning that the random effect did not account for any proportion of the variance in the outcome. The model was thus judged unfit for inference and a different approach was chosen for this attribute. For all other acoustic attributes, models were judged adequate for further inference based on the diagnoses.

For roll-off ratio, model residuals diagnostics revealed uniform distribution of fixed effects,  $D = 0.10$ ,  $p = .326$ , and random effects,  $D = 0.17$ ,  $p = .327$ , with homogeneity of variance,  $F(2, 90) = 0.01$ ,  $p = .992$ , no significant effect of outliers (outlier = 1,  $p = 0.54$ ), and adequate posterior predictive check. The model showed a statistically significant better fit than a null model without fixed effects,  $X^2(4) = 272$ ,  $p < .001$ , and provided a good predictive power,  $R^2 = 0.94$ , with a root mean square error (RMSE) of 0.22. The normalized RMSE indicated that prediction errors averaged 25% of the observed standard deviation, suggesting relatively small errors compared to the variability in the data. The random effect accounted for a relatively small proportion of the variance in the outcome (adjusted ICC = 0.13). The variance modeled in the VT condition was significantly greater than in the A condition, but the A and A+VT conditions had comparable variances (Table 2).

For even harmonic attenuation, model residuals diagnostics revealed uniform distribution of fixed effects,  $D = 0.07$ ,  $p = .799$ , and random effects,  $D = 0.12$ ,  $p = .799$ , with homogeneity of variance,  $F(2, 90) = 0.46$ ,  $p = .633$ , no significant effect of outliers (outlier = 1,  $p = .51$ ), and adequate posterior predictive check. The model showed a statistically significant better fit than a null model without fixed effects,  $X^2(4) = 176$ ,  $p < .001$ , and provided good predictive power,  $R^2 = 0.80$ , with a RMSE of 2.32. The normalized RMSE indicated that prediction errors averaged 45% of the observed standard deviation, suggesting relatively small errors compared to the variability in the data. The random effect accounted for a relatively small proportion of the variance in the outcome (adjusted ICC = 0.17). The variance modeled in the VT condition was significantly greater than in the A condition, but the A and A+VT conditions had comparable variances (Table 2).

For attack time, model residuals diagnostics revealed uniform distribution of fixed effects,  $D = 0.13$ ,  $p = .09$ , and random effects,  $D = 0.16$ ,  $p = .40$ , with homogeneity of variance,  $F(2, 90) = 0.08$ ,  $p = .93$ , no outliers, and adequate posterior predictive check. The model showed a statistically significant better fit than a null model without fixed effects,  $X^2(4) = 24.9$ ,  $p < .001$ , and provided good predictive power,  $R^2 = 0.68$ , with a RMSE of 0.08. The normalized RMSE indicated that prediction errors averaged 56% of the observed standard deviation, suggesting

relatively small errors compared to the variability in the data. The random effect accounted for a large proportion of the variance in the outcome (adjusted ICC = 0.67). No significant difference in variance was observed between the levels of the fixed effect (Table 2).

For amplitude modulation depth, model residuals diagnostics revealed uniform distribution of fixed effects,  $D = 0.14$ ,  $p = .052$ , and random effects,  $D = 0.13$ ,  $p = .716$ , with homogeneity of variance,  $F(2, 90) = 0.17$ ,  $p = .842$ , no outliers, and adequate posterior predictive check. The model showed a statistically significant better fit than a null model without fixed effects,  $\chi^2(4) = 11.2$ ,  $p = .024$ , and provided good predictive power,  $R^2 = 0.58$ , with a RMSE of 0.02. The normalized RMSE indicated that prediction errors averaged 64% of the observed standard deviation, suggesting relatively small errors compared to the variability in the data. The random effect accounted for a moderate proportion of the variance in the outcome (adjusted ICC = 0.43). No significant difference in variance was observed between the levels of the fixed effect (Table 2).

For amplitude modulation frequency, model residuals diagnostics revealed uniform distribution of fixed effects,  $D = 0.10$ ,  $p = .258$ , and random effects,  $D = 0.16$ ,  $p = .434$ , with homogeneity of variance,  $F(2, 90) = 1.58$ ,  $p = .212$ , no outliers, and adequate posterior predictive check. The model showed a statistically significant better fit than a null model without fixed effects,  $\chi^2(4) = 109$ ,  $p < .001$ , and provided a good predictive power,  $R^2 = 0.82$ , with a RMSE of 0.71. The normalized RMSE indicated that prediction errors averaged 42% of the observed standard deviation, suggesting relatively small errors compared to the variability in the data. The random effect accounted for a moderate proportion of the variance in the outcome (adjusted ICC = 0.52). The variance modeled in the VT condition was significantly greater than in the A condition, but the A and A+VT conditions had comparable variances (Table 2).
